# Supplementary material
Source: PubMed Central journal article supplement (PMC9106883)
Supplement: NIHMS1796059-supplement-320373_Major_Resources_Table.pdf [file NIHMS1796059-supplement-320373_Major_Resources_Table.pdf]

## Major Resources Table

In order to allow validation and replication of experiments, all essential research materials listed in the Methods should be included in the Major Resources Table below. Authors are encouraged to use public repositories for protocols, data, code, and other materials and provide persistent identifiers and/or links to repositories when available. Authors may add or delete rows as needed.

### Animals (in vivo studies)

| Species                 | Vendor or Source           | Background Strain    | Sex | Persistent ID / URL                                                                                                                                                     |
|-------------------------|----------------------------|----------------------|-----|-------------------------------------------------------------------------------------------------------------------------------------------------------------------------|
| mice                    | Charles River Laboratories | C57BL/6              | M   | <a href="https://www.criver.com/products-services/find-model/c57bl6-mouse?region=3611">https://www.criver.com/products-services/find-model/c57bl6-mouse?region=3611</a> |
| mice (IFN $\gamma$ -KO) | Jackson Laboratory         | B6.129S7-lfngtm1Ts/J | M   | <a href="https://www.jax.org/strain/002287">https://www.jax.org/strain/002287</a>                                                                                       |

### Genetically Modified Animals

|                 | Species | Vendor or Source   | Background Strain    | Other Information | Persistent ID / URL                                                               |
|-----------------|---------|--------------------|----------------------|-------------------|-----------------------------------------------------------------------------------|
| Parent - Male   | mice    | Jackson Laboratory | B6.129S7-lfngtm1Ts/J |                   | <a href="https://www.jax.org/strain/002287">https://www.jax.org/strain/002287</a> |
| Parent - Female | mice    | Jackson Laboratory | B6.129S7-lfngtm1Ts/J |                   | <a href="https://www.jax.org/strain/002287">https://www.jax.org/strain/002287</a> |

### Antibodies

| Target antigen | Vendor or Source | Catalog #            | Working concentration | Persistent ID / URL                                                                                                                                                                                                                                                                                                                     |
|----------------|------------------|----------------------|-----------------------|-----------------------------------------------------------------------------------------------------------------------------------------------------------------------------------------------------------------------------------------------------------------------------------------------------------------------------------------|
| IFN $\gamma$   | BioLegend        | 505808               | 1:100 FC              | <a href="https://www.biolegend.com/en-us/products/pe-anti-mouse-ifn-gamma-antibody-997">https://www.biolegend.com/en-us/products/pe-anti-mouse-ifn-gamma-antibody-997</a>                                                                                                                                                               |
| TNF $\alpha$   | BioLegend        | 506308               | 1:100 FC              | <a href="https://www.biolegend.com/en-us/products/apc-anti-mouse-tnf-alpha-antibody-975">https://www.biolegend.com/en-us/products/apc-anti-mouse-tnf-alpha-antibody-975</a>                                                                                                                                                             |
| PD1            | BioLegend        | 135206               | 1:100 FC              | <a href="https://www.biolegend.com/en-us/products/pe-anti-mouse-cd279-pd-1-antibody-6170">https://www.biolegend.com/en-us/products/pe-anti-mouse-cd279-pd-1-antibody-6170</a>                                                                                                                                                           |
| MHC-I          | Invitrogen       | 12-5998-82           | 1:100 FC              | <a href="https://www.thermofisher.com/antibody/product/MHC-Class-I-H-2Kd-H-2Dd-Antibody-clone-34-1-2S-Monoclonal/12-5998-82">https://www.thermofisher.com/antibody/product/MHC-Class-I-H-2Kd-H-2Dd-Antibody-clone-34-1-2S-Monoclonal/12-5998-82</a>                                                                                     |
| MHC-II         | BD               | 562823               | 1:100 FC              | <a href="https://wwwbdbiosciences.com/en-us/products/reagents/flow-cytometry-reagents/research-reagents/single-color-antibodies-ruo/apc-mouse-anti-mouse-i-a-b.562823">https://wwwbdbiosciences.com/en-us/products/reagents/flow-cytometry-reagents/research-reagents/single-color-antibodies-ruo/apc-mouse-anti-mouse-i-a-b.562823</a> |
| PDL1           | BioLegend        | 124312               | 1:100 FC              | <a href="https://www.biolegend.com/en-us/products/apc-anti-mouse-cd274-b7-h1-pd-l1-antibody-6655">https://www.biolegend.com/en-us/products/apc-anti-mouse-cd274-b7-h1-pd-l1-antibody-6655</a>                                                                                                                                           |
|                | Proteintech      | 17952-1-AP           | 1:1000 WB             | <a href="https://www.ptglab.com/products/CD274-Antibody-17952-1-AP.htm">https://www.ptglab.com/products/CD274-Antibody-17952-1-AP.htm</a>                                                                                                                                                                                               |
|                | Thermo Fisher    | PA5-20343            | 1:200 IHC             | <a href="https://www.thermofisher.com/antibody/product/PD-L1-Antibody-Polyclonal/PA5-20343">https://www.thermofisher.com/antibody/product/PD-L1-Antibody-Polyclonal/PA5-20343</a>                                                                                                                                                       |
| CD8            | BioLegend        | 100712               | 1:100 FC              | <a href="https://www.biolegend.com/en-us/products/apc-anti-mouse-cd8a-antibody-150">https://www.biolegend.com/en-us/products/apc-anti-mouse-cd8a-antibody-150</a>                                                                                                                                                                       |
| NCC            | Abcam            | Ab95302 / lotGR89090 | 1:1500 WB             | <a href="https://www.abcam.com/slc12a3-antibody-ab95302.html">https://www.abcam.com/slc12a3-antibody-ab95302.html</a>                                                                                                                                                                                                                   |
|                | Millipore        | AB3553               | 1:150 IF              | <a href="https://www.emdmillipore.com/US/en/product/Anti-Thiazide-Sensitive-NaCl-Cotransporter-Antibody,MM_NF-AB3553?ReferrerURL=https%3A%2F%2Fwww.google.com%2F">https://www.emdmillipore.com/US/en/product/Anti-Thiazide-Sensitive-NaCl-Cotransporter-Antibody,MM_NF-AB3553?ReferrerURL=https%3A%2F%2Fwww.google.com%2F</a>           |

|                |           |         |           |                                                                                                                                                                                                                                                                 |
|----------------|-----------|---------|-----------|-----------------------------------------------------------------------------------------------------------------------------------------------------------------------------------------------------------------------------------------------------------------|
| GAPDH          | Millipore | MAB374  | 1:1000 WB | <a href="https://www.emdmillipore.com/US/en/product/Anti-Glyceraldehyde-3-Phosphate-Dehydrogenase-Antibody-clone-6C5,MM_NF-MAB374">https://www.emdmillipore.com/US/en/product/Anti-Glyceraldehyde-3-Phosphate-Dehydrogenase-Antibody-clone-6C5,MM_NF-MAB374</a> |
| $\beta$ -actin | Sigma     | A5441   | 1:4000 WB | <a href="https://www.sigmaaldrich.com/US/en/product/sigma/a5441">https://www.sigmaaldrich.com/US/en/product/sigma/a5441</a>                                                                                                                                     |
| CD3            | Abcam     | Ab16669 | 1:150 IHC | <a href="https://www.abcam.com/cd3-antibody-sp7-ab16669.html">https://www.abcam.com/cd3-antibody-sp7-ab16669.html</a>                                                                                                                                           |

### Cultured Cells

| Name                             | Vendor or Source                                | Sex (F, M, or unknown) | Persistent ID / URL                                                                         |
|----------------------------------|-------------------------------------------------|------------------------|---------------------------------------------------------------------------------------------|
| mDCT15 cells                     | Provided by Robert Hoover & Benjamin Ko         | unknown                | N/A                                                                                         |
| Primary CD8 <sup>+</sup> T cells | Isolated from mice using negative selection kit | M                      | N/A                                                                                         |
| TK-1                             | ATCC                                            | unknown                | <a href="https://www.atcc.org/products/crl-2396">https://www.atcc.org/products/crl-2396</a> |

### Other

| Description                                                | Source / Repository                                             | Persistent ID / URL                                                                                                                                                                                                                                                                                                                                                                                                              |
|------------------------------------------------------------|-----------------------------------------------------------------|----------------------------------------------------------------------------------------------------------------------------------------------------------------------------------------------------------------------------------------------------------------------------------------------------------------------------------------------------------------------------------------------------------------------------------|
| CD8T negative selection kit                                | Thermo Fisher                                                   | #11417D<br><a href="https://www.thermofisher.com/order/catalog/product/11417D">https://www.thermofisher.com/order/catalog/product/11417D</a>                                                                                                                                                                                                                                                                                     |
| DOCA pellets                                               | Innovative Research of America                                  | #M-121<br><a href="http://www.innovrsrch.com/product/productInfo.asp?name=DEOXYCORTICOSTERONE+ACETATE+%28DOCA%2">http://www.innovrsrch.com/product/productInfo.asp?name=DEOXYCORTICOSTERONE+ACETATE+%28DOCA%2</a>                                                                                                                                                                                                                |
| Fixation/Perm eabilization Solution Kit with BD GolgiPlug™ | BD                                                              | #555028<br><a href="https://www.bdbiosciences.com/en-us/products/reagents/flow-cytometry-reagents/research-reagents/buffers-and-supporting-reagents-ruo/fixation-permeabilization-solution-kit-with-bd-golgiplug.555028">https://www.bdbiosciences.com/en-us/products/reagents/flow-cytometry-reagents/research-reagents/buffers-and-supporting-reagents-ruo/fixation-permeabilization-solution-kit-with-bd-golgiplug.555028</a> |
| Corona Green                                               | Thermo Fisher                                                   | #C36676<br><a href="https://www.thermofisher.com/order/catalog/product/C36676">https://www.thermofisher.com/order/catalog/product/C36676</a>                                                                                                                                                                                                                                                                                     |
| 7-AAD                                                      | BioLegend                                                       | #420404<br><a href="https://www.biolegend.com/en-gb/products/7-aad-viability-staining-solution-1649?GroupID=BLG13283">https://www.biolegend.com/en-gb/products/7-aad-viability-staining-solution-1649?GroupID=BLG13283</a>                                                                                                                                                                                                       |
| Activation cocktail                                        | BioLegend                                                       | #423304<br><a href="https://www.biolegend.com/en-gb/products/cell-activation-cocktail-with-brefeldin-a-9407">https://www.biolegend.com/en-gb/products/cell-activation-cocktail-with-brefeldin-a-9407</a>                                                                                                                                                                                                                         |
|                                                            |                                                                 | #423302<br><a href="https://www.biolegend.com/en-gb/products/cell-activation-cocktail-without-brefeldin-a-9402">https://www.biolegend.com/en-gb/products/cell-activation-cocktail-without-brefeldin-a-9402</a>                                                                                                                                                                                                                   |
| Renal tubule specific nanoparticles                        | Provided by Ryan M Williams, Daniel A Heller and Edgar A Jaimes | Loaded with Amnion in-vivo siRNAs against mouse PDL1 or scramble sequence (as negative control)                                                                                                                                                                                                                                                                                                                                  |
| siPDL1                                                     | ABI                                                             | s82018<br><a href="https://www.thermofisher.com/order/genome-database/details/sirna/s82018?CID=&amp;ICID=&amp;subtype=">https://www.thermofisher.com/order/genome-database/details/sirna/s82018?CID=&amp;ICID=&amp;subtype=</a>                                                                                                                                                                                                  |
| siIFN $\gamma$ R1                                          | ABI                                                             | s68098<br><a href="https://www.thermofisher.com/order/genome-database/details/sirna/s68098?CID=&amp;ICID=&amp;subtype=">https://www.thermofisher.com/order/genome-database/details/sirna/s68098?CID=&amp;ICID=&amp;subtype=</a>                                                                                                                                                                                                  |
| siIFN $\gamma$ R1                                          | ABI                                                             | s68100<br><a href="https://www.thermofisher.com/order/genome-database/details/sirna/s68100?CID=&amp;ICID=&amp;subtype=">https://www.thermofisher.com/order/genome-database/details/sirna/s68100?CID=&amp;ICID=&amp;subtype=</a>                                                                                                                                                                                                  |
