# Supplementary material
Source: PubMed Central journal article supplement (PMC9106883)
Supplement: NIHMS1796059-supplement-320373_Online.pdf [file NIHMS1796059-supplement-320373_Online.pdf]

# Supplement Material

## **The IFN $\gamma$ -PDL1 pathway enhances interaction between activated CD8<sup>+</sup> T cells and distal convoluted tubules to promote salt-sensitive hypertension**

Lance N Benson<sup>1, #</sup>, Yunmeng Liu<sup>1, #</sup>, Xiangting Wang<sup>1, §</sup>, Yunzhao Xiong<sup>1, §</sup>, Sung W Rhee<sup>1</sup>, Yunping Guo<sup>1</sup>, Katherine S Deck<sup>1</sup>, Christoph J Mora<sup>1</sup>, Lin-Xi Li<sup>2</sup>, Lu Huang<sup>2</sup>, J Tucker Andrews<sup>2</sup>, Zhiqiang Qin<sup>3</sup>, Robert S Hoover<sup>4</sup>, Benjamin Ko<sup>5</sup>, Ryan M Williams<sup>6</sup>, Daniel A Heller<sup>7</sup>, Edgar A Jaimes<sup>8</sup> & Shengyu Mu<sup>1, \*</sup>

<sup>1</sup>Department of Pharmacology and Toxicology, University of Arkansas for Medical Sciences, Little Rock, AR 72205, USA.

<sup>2</sup>Department of Microbiology and Immunology, University of Arkansas for Medical Sciences, Little Rock, AR 72205, USA.

<sup>3</sup>Department of pathology, University of Arkansas for Medical Sciences, Little Rock, AR 72205, USA.

<sup>4</sup> Department of Medicine, Tulane University School of Medicine, USA.

<sup>5</sup>Department of Medicine, University of Chicago, Chicago, IL 60637, USA.

<sup>6</sup>Department of Biomedical Engineering, The City College of New York, New York, NY 10031, USA.

<sup>7</sup>Department of Molecular Pharmacology, Memorial Sloan Kettering Cancer Center, New York, NY 10065, USA.

<sup>8</sup>Department of Medicine, Memorial Sloan Kettering Cancer Center, New York, NY 10065, USA.

\*Correspondence to: Shengyu Mu, M.B.B.S, Ph.D. Department of Pharmacology and Toxicology, University of Arkansas for Medical Sciences, 4301 W Markham St., Little Rock, AR72205, USA; Phone: +1-501-603-1087; Fax: +1-501-686-8970; E-mail: [SMu@uams.edu](mailto:SMu@uams.edu)

Figure S1

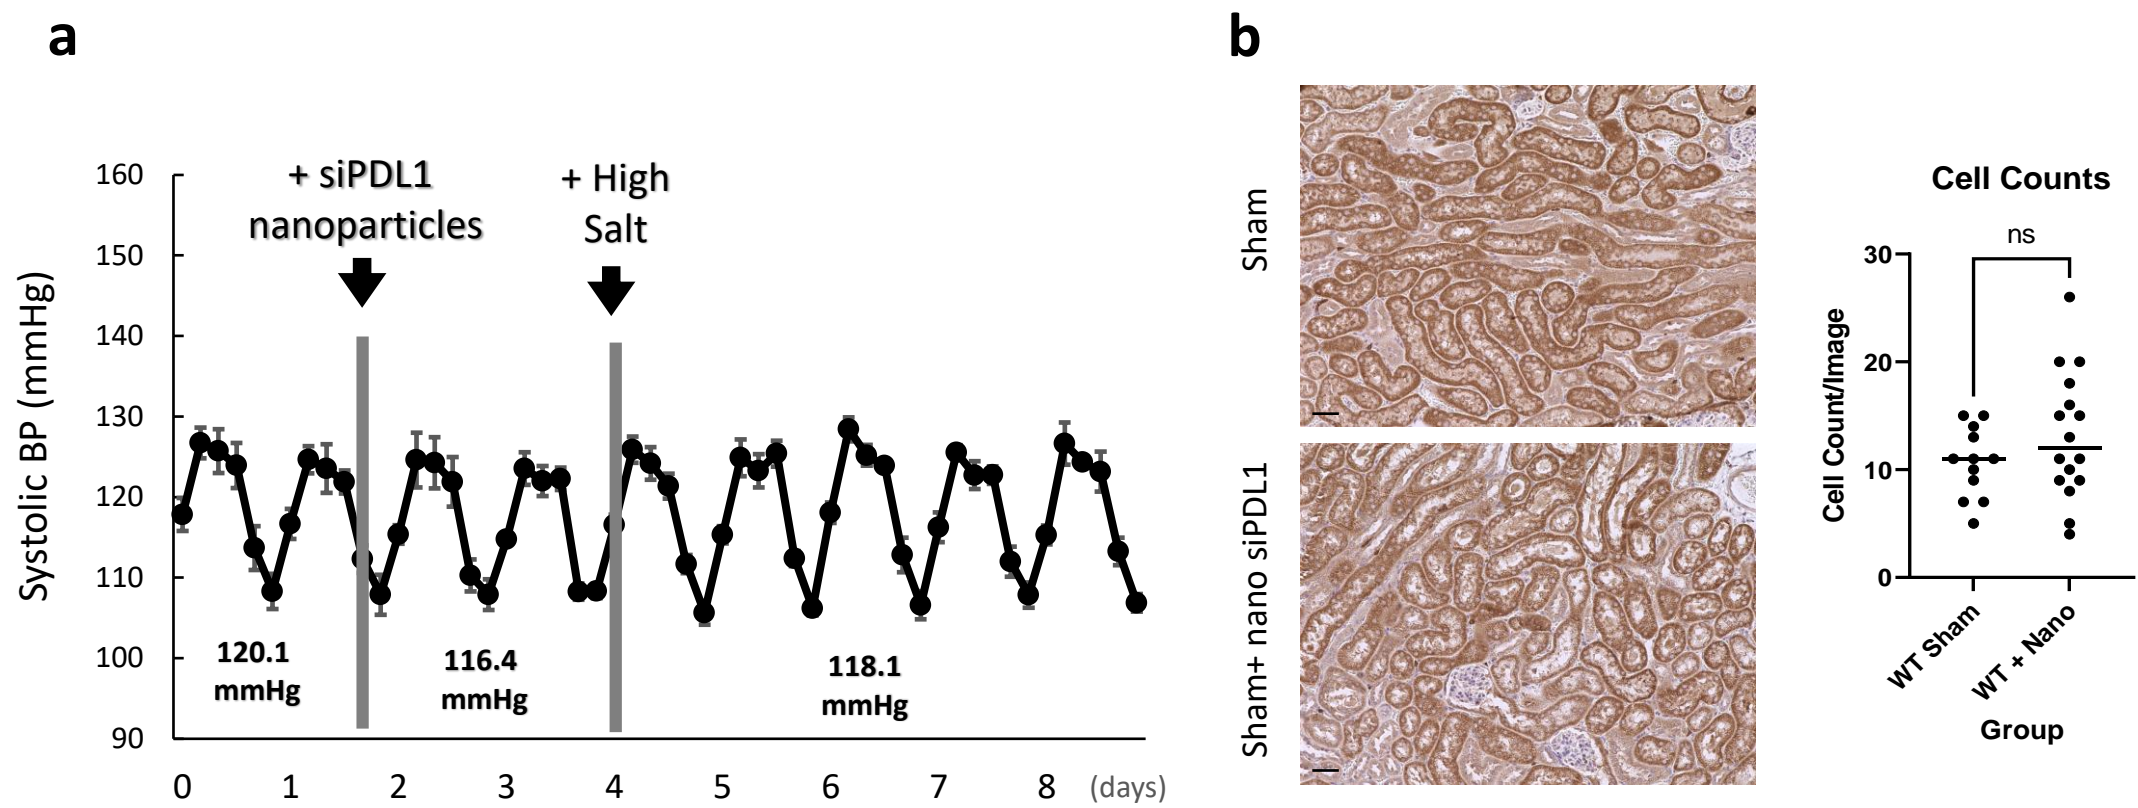

**Figure S1:** Effects of kidney-specific siPDL1-nanoparticles on systolic blood pressure (a, n=4, average SBP of each period are as indicated in figure) and renal T cell infiltration (b, n>10) in sham mice. **Statistical significance was assessed by t-test for b.**

Figure S2

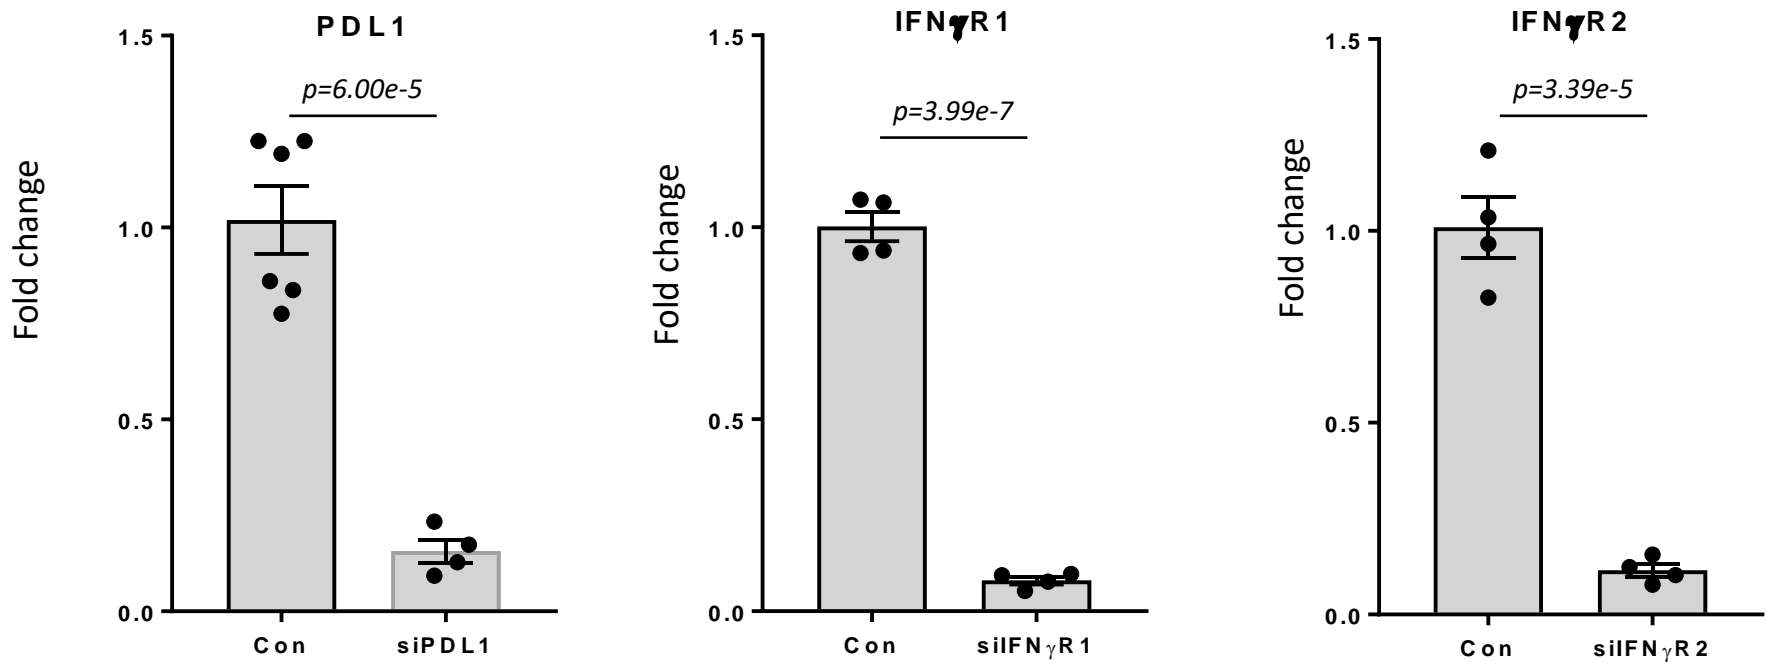

**Figure S2:** Effects of siRNA-mediated knockdown of PDL1 (ABI, s82018)/ IFN $\gamma$ R1 (ABI, s68098) / IFN $\gamma$ R2 (ABI, s68100). mRNA expression of these molecules in mDCTs with or without introducing siRNA were examined by Taqman real-time PCR. Results were normalized using GAPDH as housekeeping control. n=4-6 in each group. Data are means  $\pm$  sem. **Statistical significance was assessed by t-test.**

Figure S3

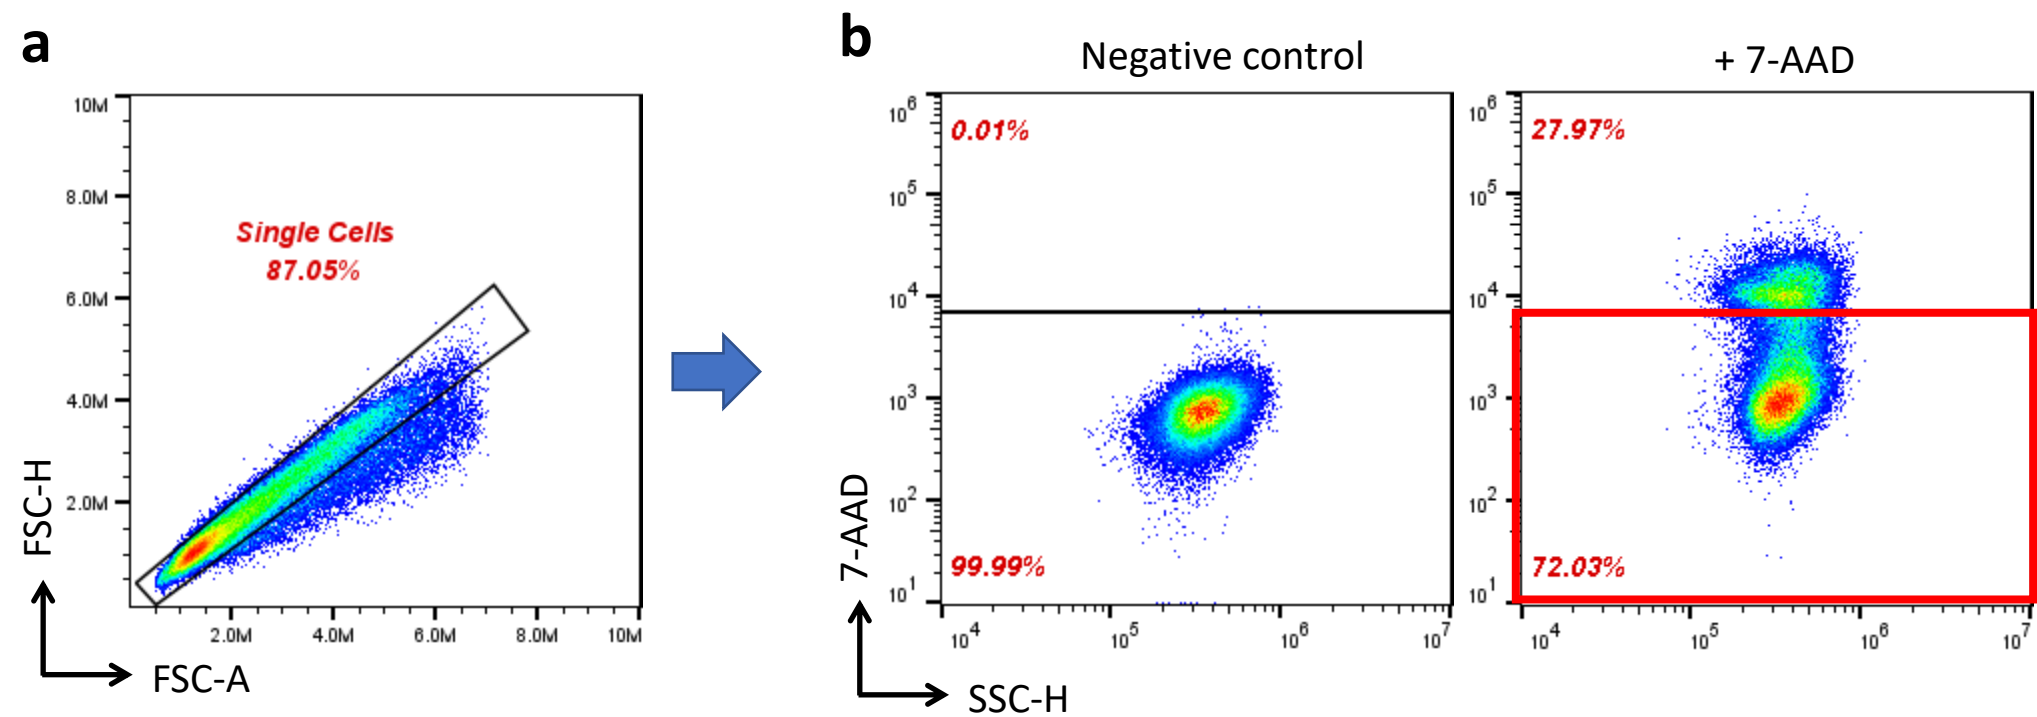

**Figure S3:** Flow cytometry gating strategy for selecting single cells (a) and intact live cells (b).

Figure S4

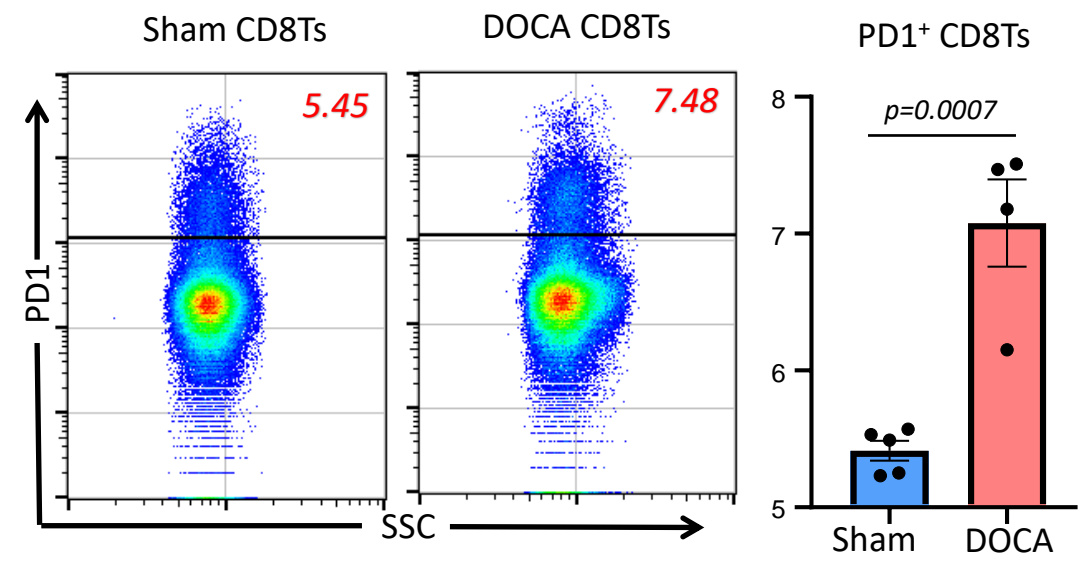

**Figure S4:** Cell surface expression of PD1 on CD8Ts isolated from DOCA mice and sham mice. n=4-5 mice. **Statistical significance was assessed by t-test.**

Figure S5

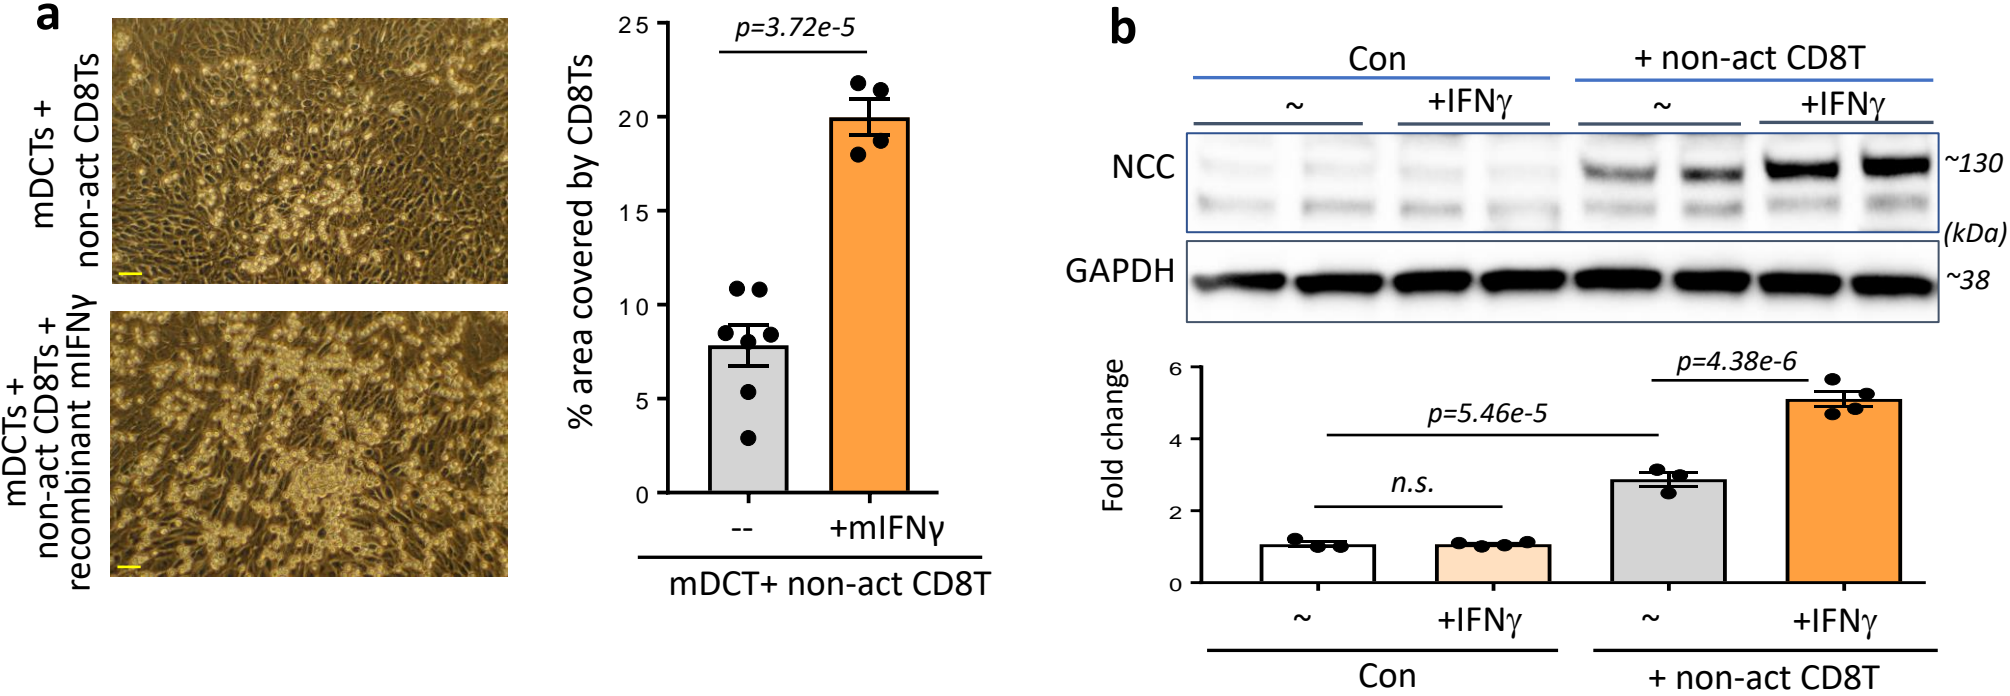

**Figure S5: (a)**, Effects of additional mIFN $\gamma$  on cell-to-cell adhesion between mDCTs and naïve (non-act) CD8Ts. After overnight co-culture, cells were washed with PBS x 2 times. Data are representative of  $n>7$  images in each group.  $**p<0.01$ . **(b)**, Effects of additional mIFN $\gamma$  on NCC expression in mDCT cells  $\pm$  co-culture with naïve CD8Ts. Quantitative western blot data were normalized using GAPDH as loading control.  $n=3-4$  in each group. **Statistical significance was assessed by t-test for a, and ANOVA for b.**

Figure S6

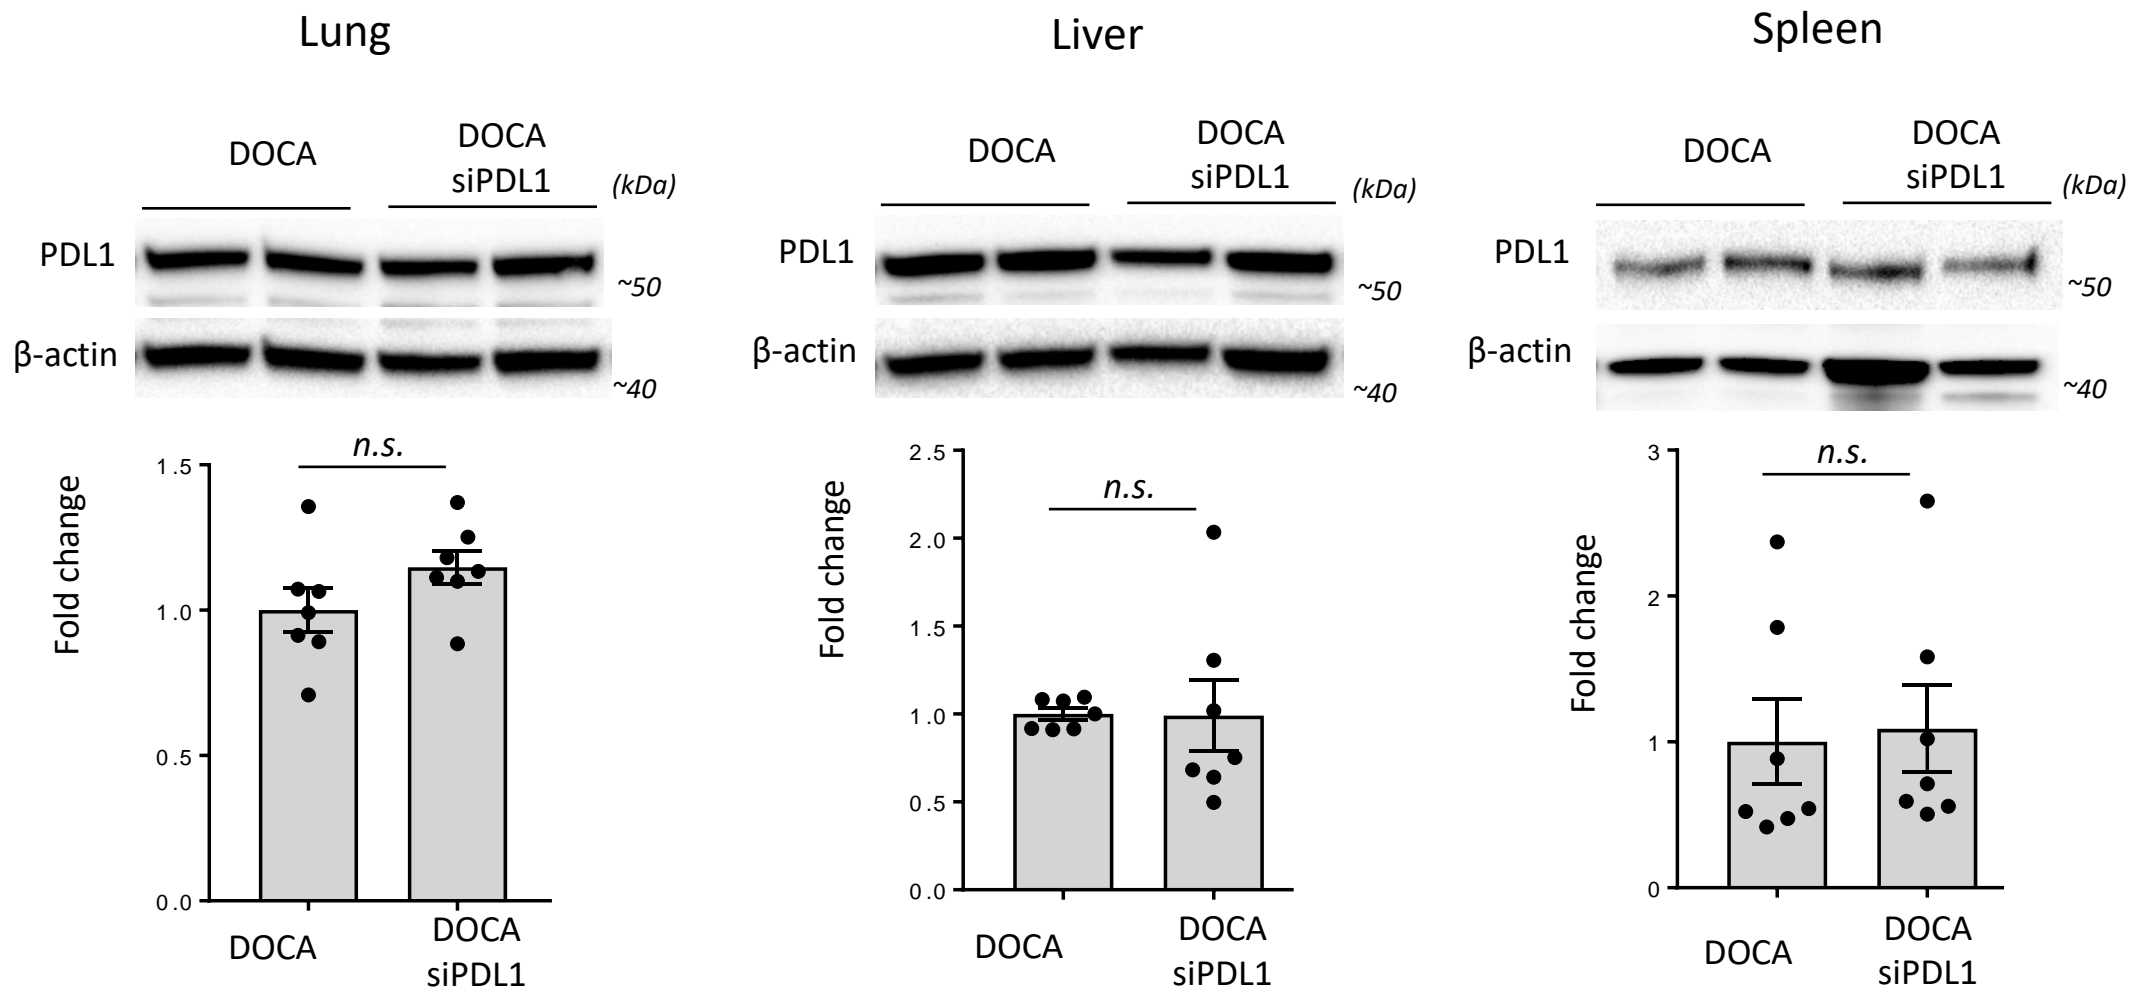

**Figure S6:** Effects of kidney-specific siPDL1-nanoparticles on PDL1 expression in other organs (lung, liver and spleen), n=7 each group. **Statistical significance was assessed by t-test.**
