# Supplementary material
Source: PubMed Central journal article supplement (PMC9106883)

Supplement -- Raw images of all representative western blots -page1

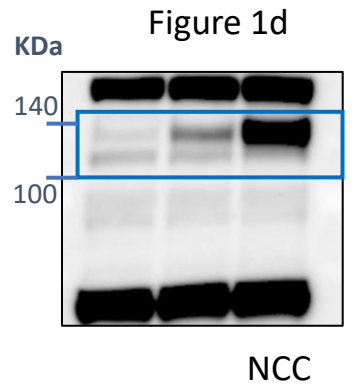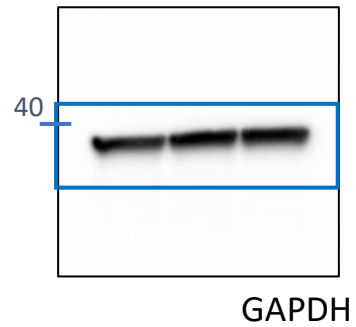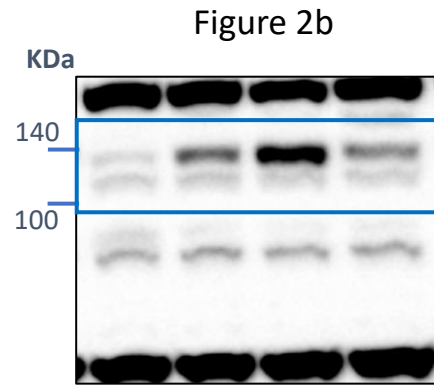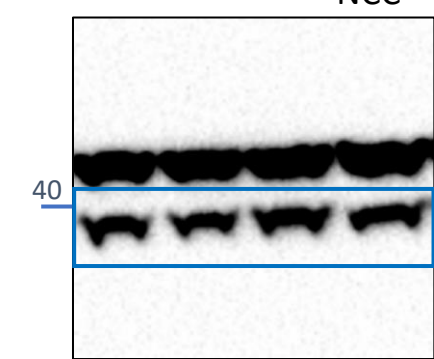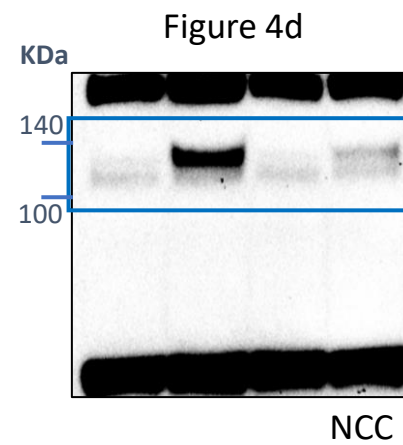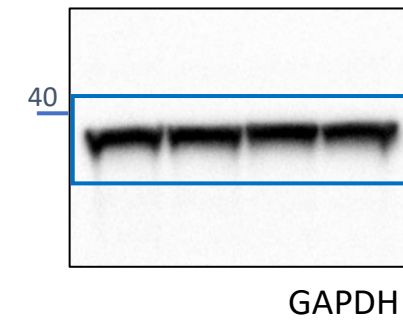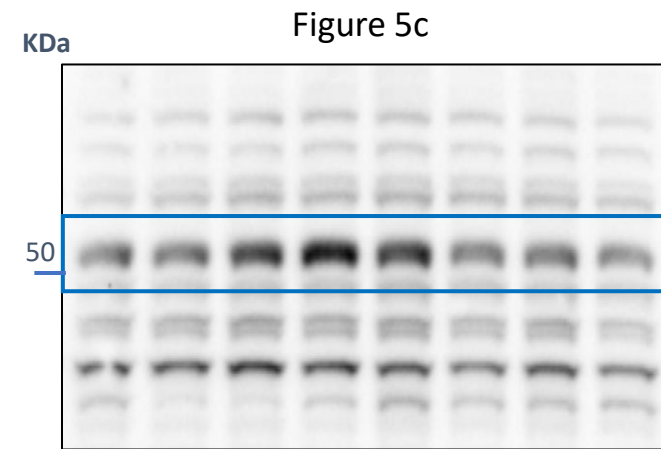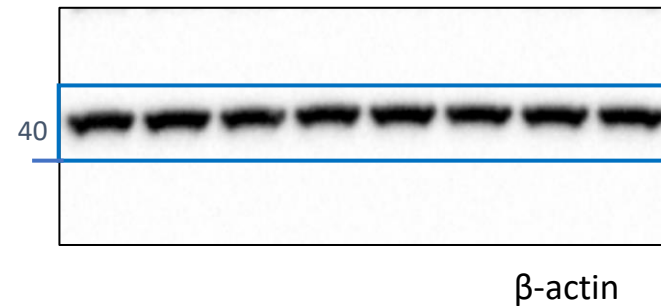

Supplement -- Raw images of all representative western blots –page 2

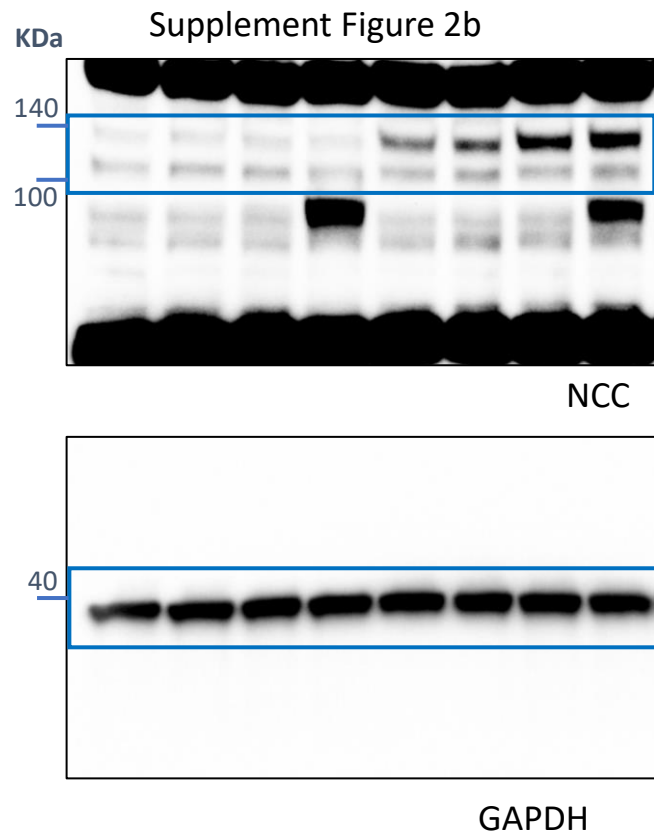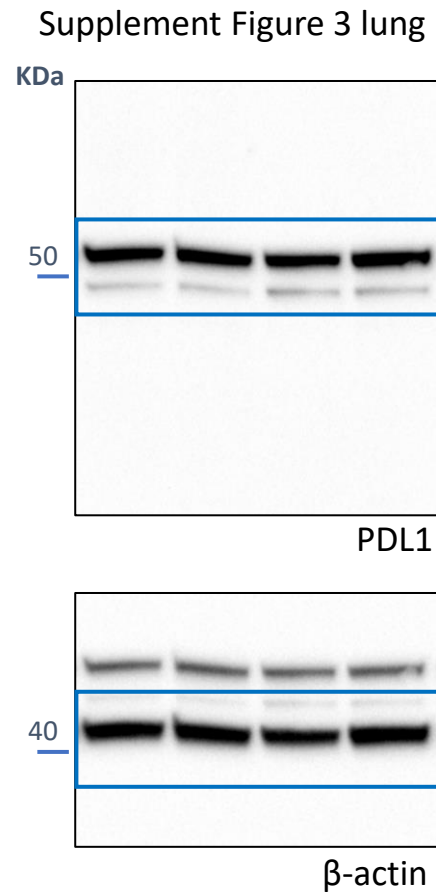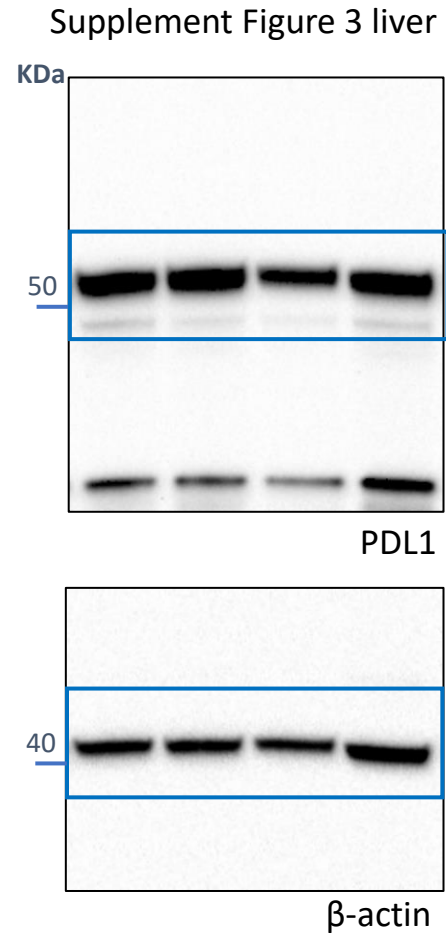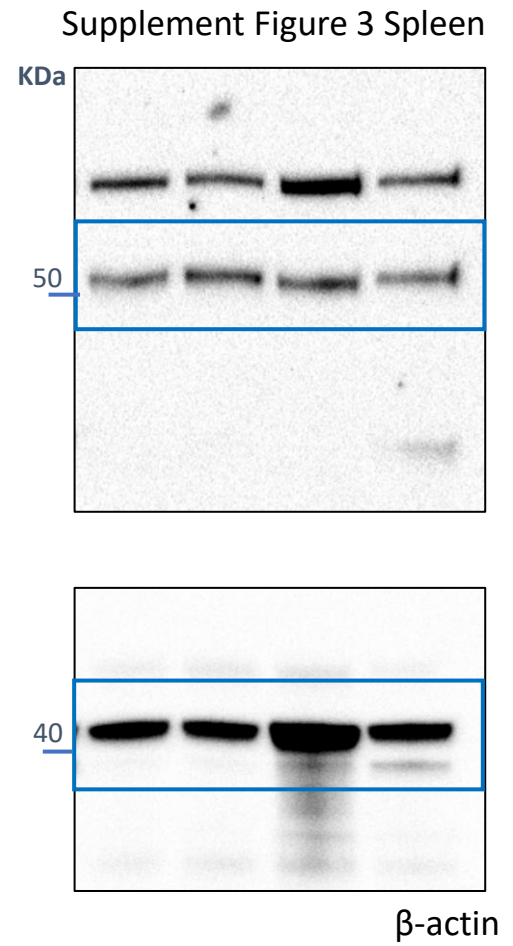

Supplement: NIHMS1796059-supplement-320373_Uncut_Gel_Blots.pdf [file NIHMS1796059-supplement-320373_Uncut_Gel_Blots.pdf]
